# Supplementary material for: AIEE-Active Flavones as a Promising Tool for the Real-Time Tracking of Uptake and Distribution in Live Zebrafish
Source: Int J Mol Sci. 2023 Jun 15;24(12):10183. doi: 10.3390/ijms241210183 (PMC10299116; doi:10.3390/ijms241210183)
Supplement: Supplementary file 1 [file ijms-24-10183-s001.zip › ijms-2419621-supplementary.pdf]

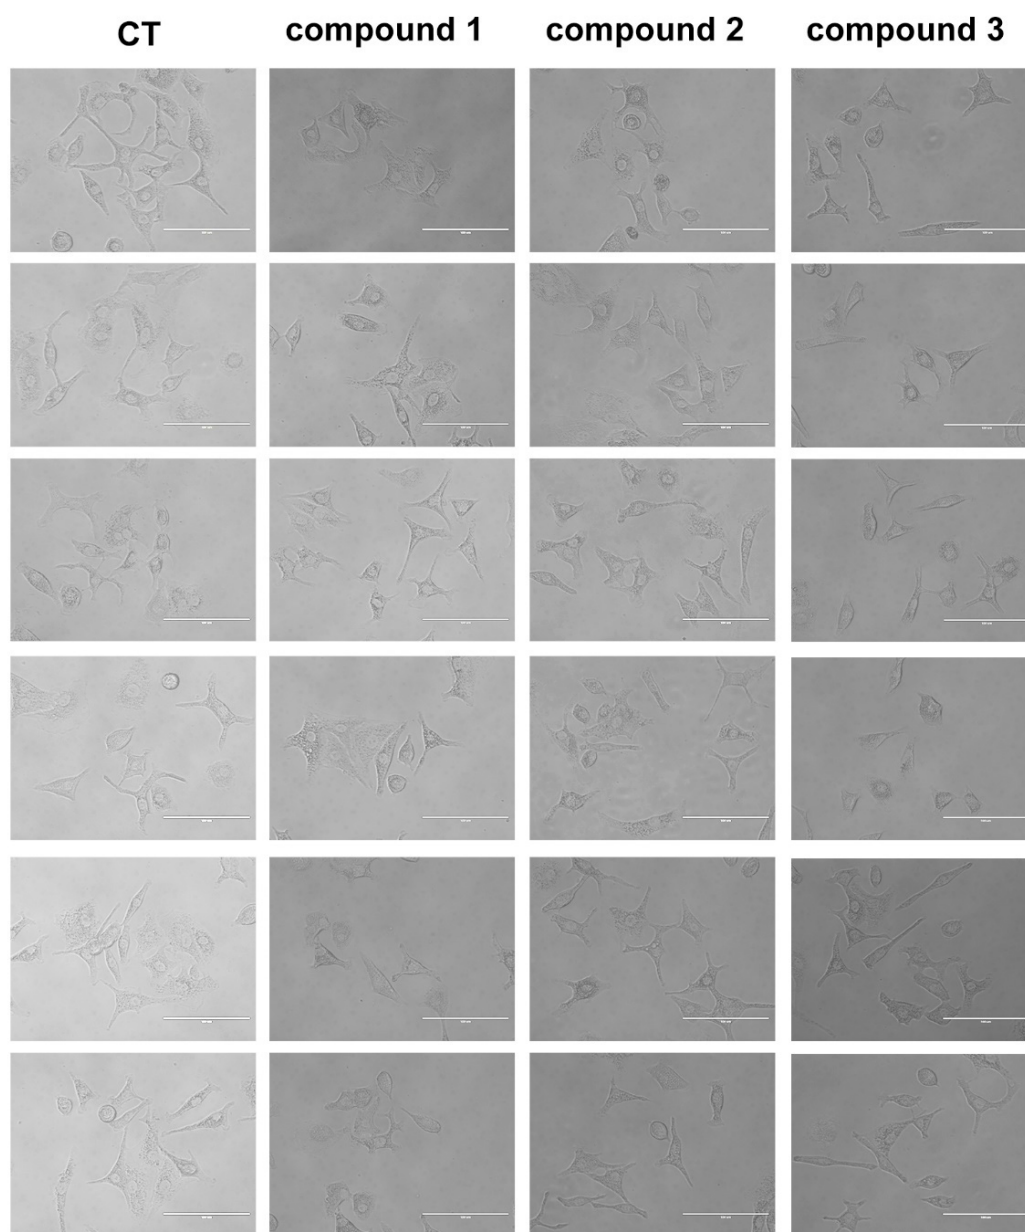

**Figure S1.** The morphological images of A549 cells. Brightfield images at multiple fields of view indicate that the compounds have no effect on cell morphology. All images were performed under a 40-fold lens. Scale bars, 100  $\mu\text{m}$ .

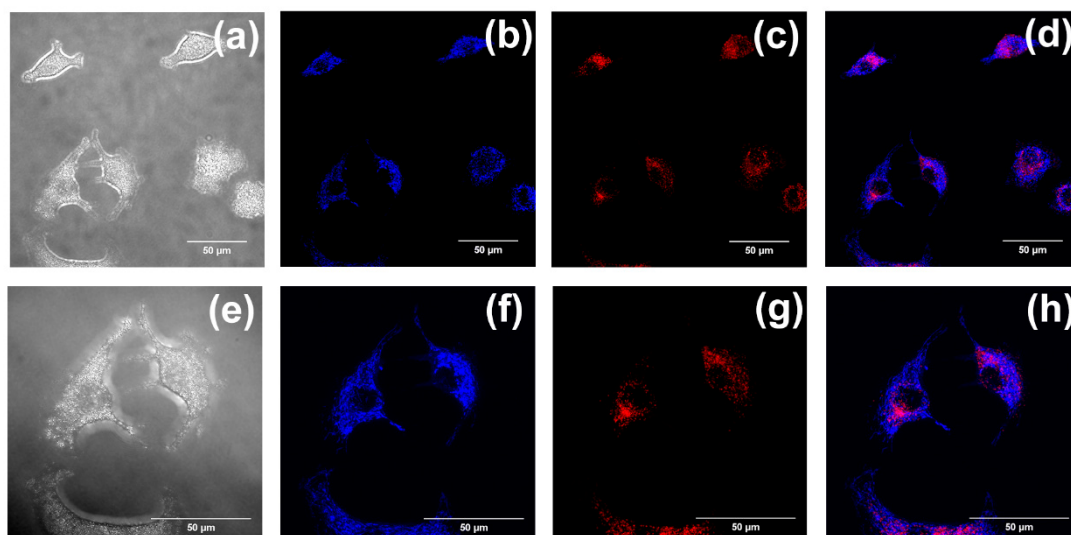

**Figure S2.** (a,e) Brightfield pictures of A549 cells. Co-localized images of A549 cells incubated with compound **1** (20  $\mu$ M) (b,f) and Lyso-Tracker Red (200 nM) (c,g) for 30 min. (d,h) The merged images co-cultured with **1**. The excitation wavelength of compound **1** was 405 nm. The excitation wavelength of Lyso-Tracker Red was 577 nm. (a–d) were performed on the confocal laser scanning microscope under a 60-fold, and (e–h) were performed under a 100-fold oil immersion lens. Scale bars, 50  $\mu$ m.

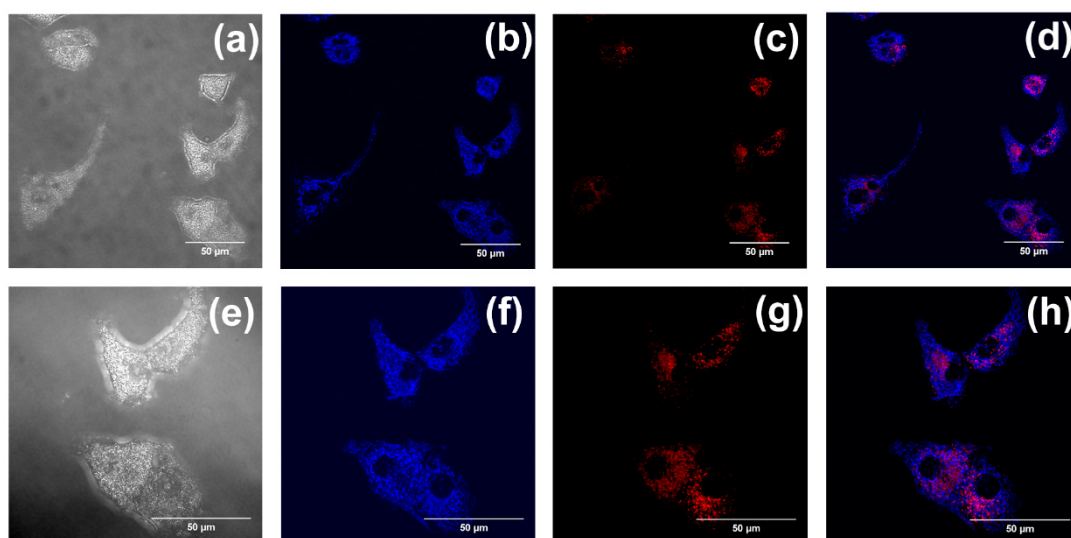

**Figure S3.** (a,e) Brightfield pictures of A549 cells. Co-localized images of A549 cells incubated with compound **2** (20  $\mu$ M) (b,f) and Lyso-Tracker Red (200 nM) (c,g) for 30 min. (d,h) The merged images co-cultured with **2**. The excitation wavelength of compound **2** was 405 nm. The excitation wavelength of Lyso-Tracker Red was 577 nm. (a–d) were performed on the confocal laser scanning microscope under a 60-fold, and (e–h) were performed under a 100-fold oil immersion lens. Scale bars, 50  $\mu$ m.

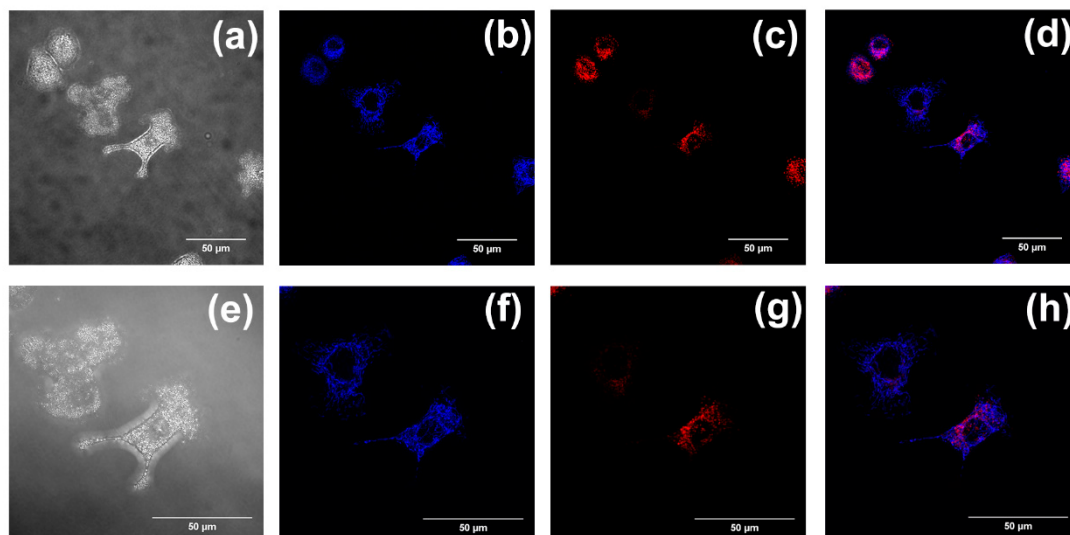

**Figure S4.** (a,e) Brightfield pictures of A549 cells. Co-localized images of A549 cells incubated with compound **3** (20  $\mu$ M) (b,f) and Lyso-Tracker Red (200 nM) (c,g) for 30 min. (d,h) The merged images co-cultured with **3**. The excitation wavelength of compound **3** was 405 nm. The excitation wavelength of Lyso-Tracker Red was 577 nm. (a–d) were performed on the confocal laser scanning microscope under a 60-fold, and (e–h) were performed under a 100-fold oil immersion lens. Scale bars, 50  $\mu$ m.

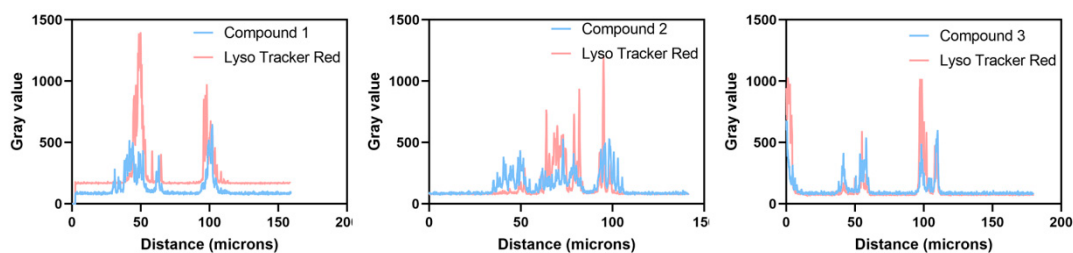

**Figure S5.** The Plot Profile of compounds **1–3** and Lyso Tracker Red.

**Table S1.** Corresponding R values of compounds **1–3**.

| Compound | Corresponding R Values<br>(Pearson Correlation Coefficient) |
|----------|-------------------------------------------------------------|
| <b>1</b> | 0.37                                                        |
| <b>2</b> | 0.53                                                        |
| <b>3</b> | 0.56                                                        |

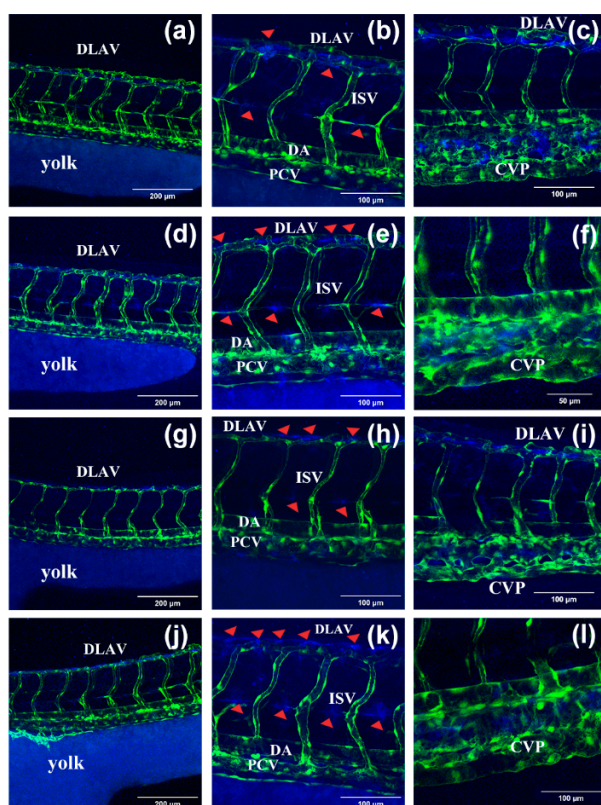

**Figure S6.** (a,b) and (g,h) Fluorescence images of Tg(fli1a:EGFP) after incubation with compound 1 (40  $\mu$ M) and compound 3 (40  $\mu$ M) for 1 h in 48 hpf larve, respectively. In (b), most of the compound adhere to the surface of the blood vessels, and a few enter the blood vessels. (d,e) and (j,k) Fluorescence images of Tg(fli1a:EGFP) after incubation with compound 1 (40  $\mu$ M) and compound 3 (40  $\mu$ M) for 2 h at 48 hpf, respectively. Arrowheads in (b,e) and (h,k) indicates the compound 1 and compound 3 adhere to the surface of the blood vessels, respectively. In (e,k), the amount of compounds absorbed into the blood vessels is greatly increased. The compounds are indicated by triangles and numbered in red in (b,e,h,k). (c,f) and (i,l) The compound 1 and compound 3 entered the CVP. Scale bars, 200  $\mu$ m (a,d,g,j), 100  $\mu$ m (b,c,e,h,i,k,l), 50  $\mu$ m (f).

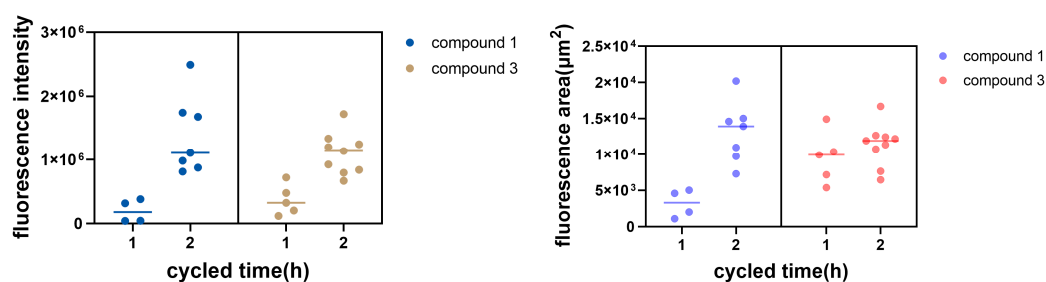

**Figure S7.** Fluorescence intensity of compounds 1 and 3 cycled for 1 h and 2 h, respectively and fluorescence area of compounds 1 and 3 cycled for 1 h and 2 h, respectively. The number of dots in the Figure S7 corresponds to the red triangles in the Figure S6.

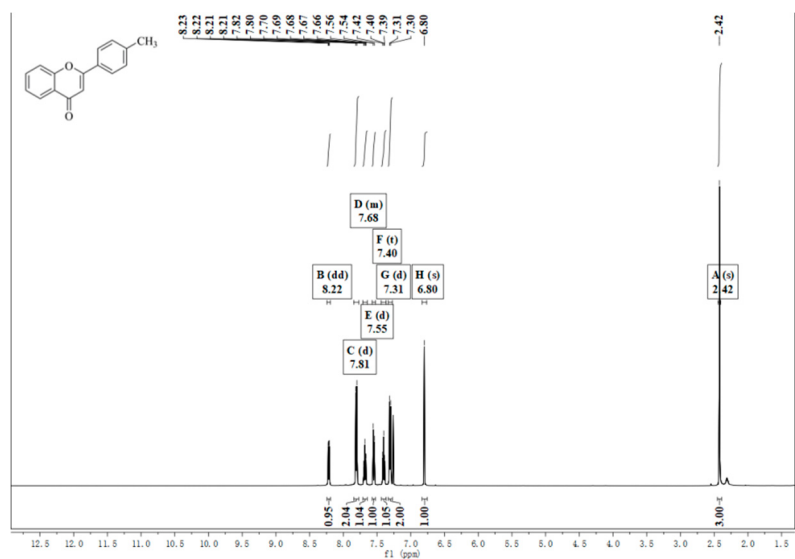

Figure S8. <sup>1</sup>H-NMR of compound 1.

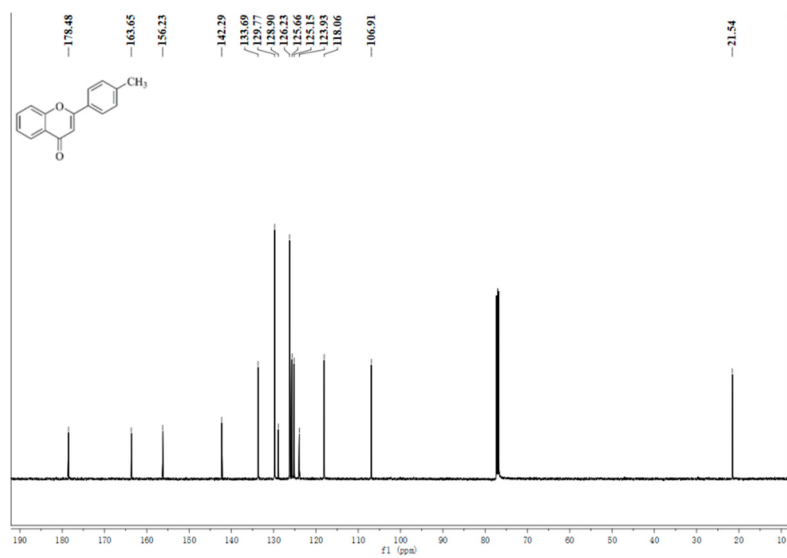

Figure S9. <sup>13</sup>C-NMR of compound 1.

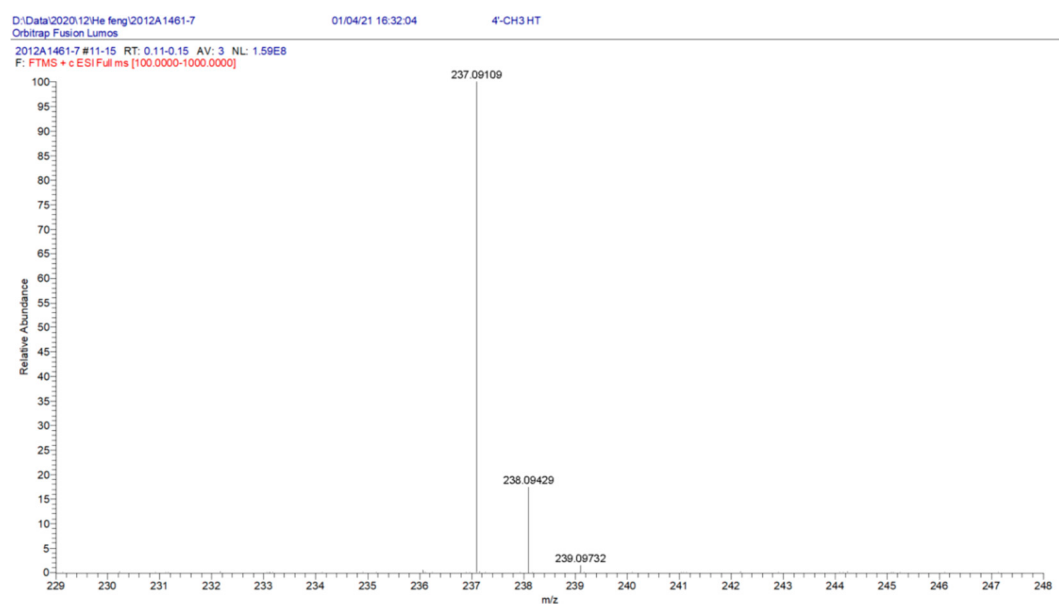

### SPECTRUM - simulation :

| m/z       | Theo. Mass | Delta (ppm) | RDB equiv. | Composition                                    |
|-----------|------------|-------------|------------|------------------------------------------------|
| 237.09109 | 237.09101  | 0.35        | 10.5       | C <sub>16</sub> H <sub>13</sub> O <sub>2</sub> |

Limits:

- 1) Charge: +1
- 2) Nitrogen-Rule: Do not use
- 3) Mass tolerance: 5 ppm
- 4) Elements in use: <sup>12</sup>C (0~30), <sup>1</sup>H (0~60), <sup>16</sup>O (0~10), <sup>14</sup>N (0~5)

**Figure S10.** High-Resolution Mass Spectrometry (HRMS) of compound **1**.

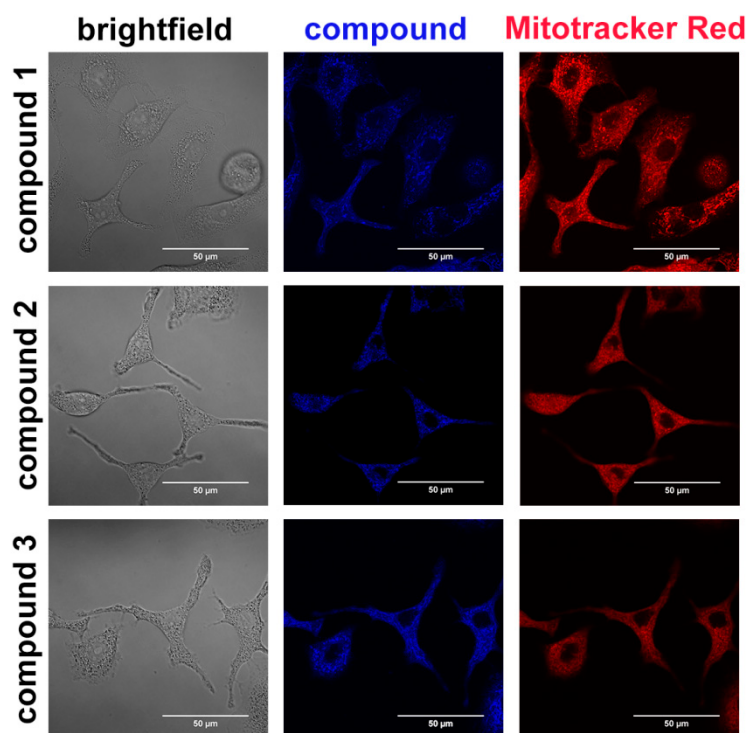

**Figure S11.** The two-dimension co-localized images of A549 cells incubated with compounds 1–3 (20  $\mu$ M) and Mito Tracker Red (200 nM) for 30 min. Scale bars, 50  $\mu$ m.

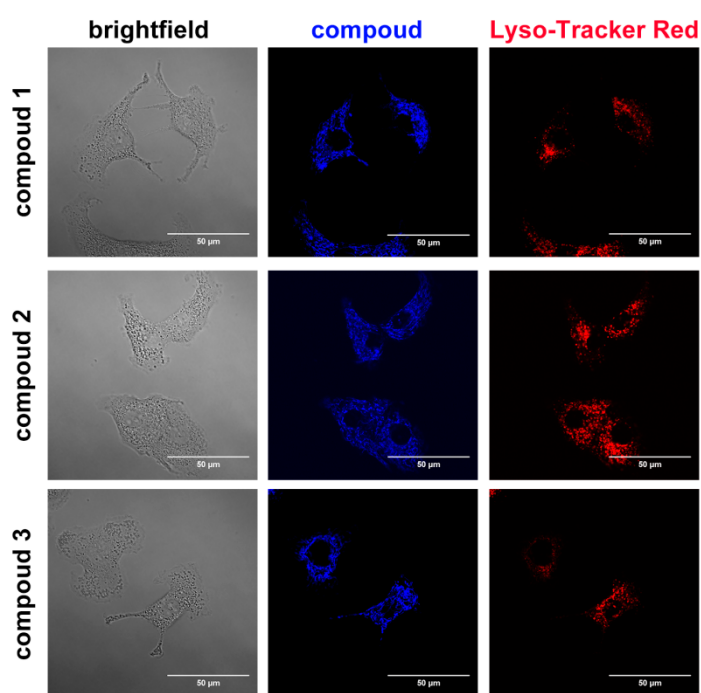

**Figure S12.** The two-dimension co-localized images of A549 cells incubated with compounds 1–3 (20  $\mu$ M) and Lyso-Tracker Red (200 nM) for 30 min. Scale bars, 50  $\mu$ m.
